# Supplementary material
Source: PubMed Central journal article supplement (PMC4451139)
Supplement: NIHMS692544-supplement-supp.pdf [file NIHMS692544-supplement-supp.pdf]

## Supporting Information

**Table S1. Strains and Plasmids**

| Plasmids or strains       | Description                                                                                                                                                                                                                 | Antibiotic Resistance             | Reference  |
|---------------------------|-----------------------------------------------------------------------------------------------------------------------------------------------------------------------------------------------------------------------------|-----------------------------------|------------|
| <i>Strains</i>            |                                                                                                                                                                                                                             |                                   |            |
| <i>E. coli</i>            |                                                                                                                                                                                                                             |                                   |            |
| HB101                     | F <sup>-</sup> Δ( <i>gpt-proA</i> )62 <i>leuB6 supE44 ara-14 galK2 lacY 1</i> Δ ( <i>mcrC-mrr</i> ) <i>rpsL20</i> (Str <sup>R</sup> ) <i>xyl-5 mtl-1recA13</i>                                                              | Str <sup>R</sup>                  | Promega    |
| XL1-Blue                  | F <sup>'</sup> ::Tn10 <i>proA<sup>+</sup>B<sup>+</sup> lacIq</i> Δ( <i>lacZ</i> )M15/ <i>recA1 endA1 gyrA96</i> (NaI <sup>R</sup> ) <i>thi hsdR17 (r<sub>K</sub><sup>-</sup>m<sub>K</sub><sup>+</sup>) supE44 relA1 lac</i> | Amp <sup>R</sup>                  | Stratagene |
| <i>R. capsulatus</i>      |                                                                                                                                                                                                                             |                                   |            |
| MT-RBC1                   | Δ( <i>petABC::spe</i> )                                                                                                                                                                                                     | Spe <sup>R</sup>                  | (28)       |
| BK-RBC1                   | Δ( <i>petABC::spe</i> ) Δ( <i>recA::gen</i> )                                                                                                                                                                               | Spe <sup>R</sup> Gen <sup>R</sup> | This work  |
| <i>Plasmids</i>           |                                                                                                                                                                                                                             |                                   |            |
| pBluescript II            | Cloning vector (pBS)                                                                                                                                                                                                        | Amp <sup>R</sup>                  | Stratagene |
| pRK2013                   | Conjugation helper                                                                                                                                                                                                          | Kan <sup>R</sup>                  | (52)       |
| pRK415                    | Broad host-range vector                                                                                                                                                                                                     | Tet <sup>R</sup>                  | (52)       |
| pPETI-S                   | 3.4 kb fragment of <i>petABC</i> operon in pBR322 with <i>petB</i> tagged with Strep tag                                                                                                                                    | Amp <sup>R</sup>                  | (22)       |
| pPETI-F                   | 3.4 kb fragment of <i>petABC</i> operon in pBR322 with <i>petB</i> tagged with Flag tag                                                                                                                                     | Amp <sup>R</sup>                  | (22)       |
| pWX1                      | 1.9 kb of <i>recA</i> region in pBS                                                                                                                                                                                         | Amp <sup>R</sup>                  | This work  |
| pWX2                      | Δ( <i>recA::gen</i> ) allele with a <i>gen</i> cassette inserted between the SmaI and HindIII sites of <i>recA</i>                                                                                                          | Amp <sup>R</sup> Gen <sup>R</sup> | This work  |
| pWX3                      | 2 kb <i>gen</i> cassette inactivating <i>recA</i> Δ( <i>recA::gen</i> ) in pRK415                                                                                                                                           | Tet <sup>R</sup> Gen <sup>R</sup> | This work  |
| <i>One Plasmid system</i> |                                                                                                                                                                                                                             |                                   |            |
| pBK7                      | Fragment of NotI linker fused to <i>petB</i> and <i>petC</i> genes in pBS                                                                                                                                                   | Amp <sup>R</sup>                  | This work  |
| pBK8                      | Fragment of NotI linker fused to <i>petB</i> and                                                                                                                                                                            | Amp <sup>R</sup>                  | This work  |

|                                |                                                                                                                                                                             |                  |           |
|--------------------------------|-----------------------------------------------------------------------------------------------------------------------------------------------------------------------------|------------------|-----------|
| pBK6                           | <i>petA</i> genes in pBS<br>4.9 kb <i>petAB1<sup>wt</sup>B2<sup>wt</sup>C</i> in pRK415-<br>derivative; <i>petB2</i> is tagged with the Strep<br>epitope ( <i>petB2-S</i> ) | Kan <sup>R</sup> | This work |
| pBK22                          | Fragment of NotI linker fused to<br><i>petB::F144R</i> and <i>petA</i> in pBS                                                                                               | Amp <sup>R</sup> | This work |
| pBK27                          | Fragment of NotI linker fused to<br><i>petB::H217L</i> and <i>petC</i> s in pBS                                                                                             | Amp <sup>R</sup> | This work |
| pBK32                          | 4.9 kb <i>petAB1<sup>F144R</sup>B2<sup>H217L</sup>C</i> in pRK415-<br>derivative; <i>petB2::H217L</i> is tagged with<br>the Strep epitope ( <i>petB2-S</i> )                | Kan <sup>R</sup> | This work |
| <i>Two plasmids<br/>system</i> |                                                                                                                                                                             |                  |           |
| pMTS1-S                        | 3.4 kb fragment of <i>petABC</i> in pRK415;<br><i>petB</i> is tagged with the Strep epitope<br>( <i>petB-S</i> )                                                            | Kan <sup>R</sup> | (22)      |
| pBK21                          | 3.4 kb fragment of <i>petABC</i> in pRK415;<br><i>petB</i> is tagged with the Flag epitope<br>( <i>petB-F</i> )                                                             | Tet <sup>R</sup> | This work |
| pBK18                          | 3.4 kb fragment of <i>petAB<sup>H217L</sup>C</i> in pPETI-<br>F; <i>petB::H217L</i> is tagged with the Flag<br>epitope ( <i>petB-F</i> )                                    | Amp <sup>R</sup> | This work |
| pBK19                          | 3.4 kb fragment of <i>petAB<sup>F144R</sup>C</i> in pPETI-<br>S; <i>petB::F144R</i> is tagged with the Strep<br>epitope ( <i>petB-S</i> )                                   | Amp <sup>R</sup> | This work |
| pBK25                          | 3.4 kb fragment of <i>petAB<sup>F144R</sup>C</i> in<br>pRK415; <i>petB::F144R</i> is tagged with the<br>Strep epitope ( <i>petB-S</i> )                                     | Kan <sup>R</sup> | This work |
| pBK28                          | 3.4 kb fragment of <i>petAB<sup>H217L</sup>C</i> in<br>pRK415; <i>petB::H217L</i> is tagged with the<br>Flag epitope ( <i>petB-F</i> )                                      | Tet <sup>R</sup> | This work |

The *petB* is carboxyl-terminally epitope-tagged with Strep (*petB-S*) or Flag (*petB-F*) tags. Str<sup>R</sup>, Amp<sup>R</sup>, Spe<sup>R</sup>, Gen<sup>R</sup>, Kan<sup>R</sup>, Tet<sup>R</sup> correspond to streptomycin, ampicillin, spectinomycin, gentamicin, kanamycin and tetracycline resistance, respectively.

**Table S2. Ps and Res colony forming abilities of strains producing mutant cytochrome *bc*<sub>1</sub> heterodimers.** A, one-plasmid system, B two-plasmids system. See **Table S1** for strain descriptions.

A.

| Strain       | Medium | Dilution 10 <sup>-4</sup> |             | Dilution 10 <sup>-5</sup> |             | Dilution 10 <sup>-6</sup> |             |
|--------------|--------|---------------------------|-------------|---------------------------|-------------|---------------------------|-------------|
|              |        | *Large (Ps)               | Total (Res) | *Large (Ps)               | Total (Res) | *Large (Ps)               | Total (Res) |
| pBK6/MT-RBC1 | MPYE   | 47                        | 1725        | 3                         | 462         | 0                         | 63          |
|              | Med A  | 60                        | 2818        | 10                        | 444         | 1                         | 43          |
| pBK6/BK-RBC1 | MPYE   | 2                         | 1558        | 1                         | 242         | 0                         | 38          |
|              | Med A  | 1                         | 1460        | 0                         | 211         | 0                         | 32          |

\*Large (Ps<sup>+</sup>) colonies obtained under Ps, and Total (Res), total numbers of colonies obtained under Res growth conditions; numbers indicate colony forming units (cfu)/ml

B.

| Strain                                       | Dilution 10 <sup>-2</sup> |            | Dilution 10 <sup>-3</sup> |            | Dilution 10 <sup>-4</sup> |            | Dilution 10 <sup>-5</sup> |            |
|----------------------------------------------|---------------------------|------------|---------------------------|------------|---------------------------|------------|---------------------------|------------|
|                                              | **Large (Ps)              | Total (Ps) | Large (Ps)                | Total (Ps) | Large (Ps)                | Total (Ps) | Large (Ps)                | Total (Ps) |
| pBK25 + pBK28/MT-RBC1                        |                           |            |                           |            |                           |            |                           |            |
| cyt <i>b</i> -S:F144R+cyt <i>b</i> -F: H217L | 0                         | NC         | 1                         | NC         | 0                         | NC         | 0                         | 782        |
| pBK25 + pBK28/BK-RBC1                        |                           |            |                           |            |                           |            |                           |            |
| cyt <i>b</i> -S:F144R+cyt <i>b</i> -F: H217L | 1                         | NC         | 0                         | 1158       | 0                         | 184        | 0                         | 13         |

\*\*Large (Ps<sup>+</sup>) colonies obtained under Ps, and Total (Ps) total numbers of colonies (*i.e.*, large and small) obtained under Res growth conditions; numbers indicate colony forming units (cfu)/ml; NC, not counted (too many colonies).
